# Supplementary material for: Mitonuclear interactions may contribute to fitness of fungal hybrids
Source: PubMed Central journal article supplement (PMC5786003; doi:10.1038/s41598-018-19922-w), 2018-01-26
Supplement: 41598_2018_19922_MOESM1_ESM.pdf [file 41598_2018_19922_MOESM1_ESM.pdf]

## Supplementary Information for

### Mitonuclear interactions may contribute to fitness of fungal hybrids

**Luana Giordano<sup>1,2</sup>, Fabiano Sillo<sup>1\*</sup>, Matteo Garbelotto<sup>3</sup>, Paolo Gonthier<sup>1</sup>**

<sup>1</sup>University of Torino, Department of Agricultural, Forest and Food Sciences (DISAFA), Largo Paolo Braccini 2, I-10095 Grugliasco (TO), Italy

<sup>2</sup>Centre of Competence for the Innovation in the Agro-Environmental Field (AGROINNOVA), University of Torino, Largo Paolo Braccini 2, I-10095 Grugliasco (TO), Italy

<sup>3</sup>University of California, Berkeley, Department of Environmental Science, Policy and Management, Forest Pathology and Mycology Laboratory, 54 Mulford Hall, 94720 Berkeley, California, USA

\*Corresponding author: **Fabiano Sillo** - [fabiano.sillo@unito.it](mailto:fabiano.sillo@unito.it)

**Supplementary tables**

Table S1.....2

Table S2.....3

Table S3.....3

Table S4.....3

Table S5.....4

Table S6.....4

Table S7.....5

**Table S1.** Radial growth (average measure in mm  $\pm$  SD) of the four different genotypes (ten replicate per genotype).

| <b>Genotype</b> | <b>Replicate #</b> | <b>3 days</b>  | <b>5 days</b>   | <b>7 days</b>   | <b>9 days</b>   | <b>11 days</b>  | <b>13 days</b>  | <b>15 days</b>  |
|-----------------|--------------------|----------------|-----------------|-----------------|-----------------|-----------------|-----------------|-----------------|
| <i>A,a</i>      | 1                  | 5.5 $\pm$ 2.12 | 12.5 $\pm$ 0.71 | 18.5 $\pm$ 0.71 | 26.5 $\pm$ 2.12 | 29.5 $\pm$ 2.12 | 34.5 $\pm$ 0.71 | 40 $\pm$ 0      |
| <i>A,a</i>      | 2                  | 3.5 $\pm$ 0.71 | 9.5 $\pm$ 0.71  | 17 $\pm$ 1.41   | 23.5 $\pm$ 2.12 | 27 $\pm$ 1.41   | 32.5 $\pm$ 0.71 | 35 $\pm$ 0      |
| <i>A,a</i>      | 3                  | 2.5 $\pm$ 0.71 | 8.5 $\pm$ 0.71  | 17 $\pm$ 0      | 25.5 $\pm$ 0.71 | 29 $\pm$ 1.41   | 32.5 $\pm$ 0.71 | 34 $\pm$ 1.41   |
| <i>A,a</i>      | 4                  | 4.5 $\pm$ 0.71 | 10.5 $\pm$ 0.71 | 19.5 $\pm$ 0.71 | 27 $\pm$ 0      | 30 $\pm$ 0      | 35 $\pm$ 1.41   | 37 $\pm$ 0      |
| <i>A,a</i>      | 5                  | 4 $\pm$ 0      | 9.5 $\pm$ 0.71  | 17 $\pm$ 0      | 24.5 $\pm$ 0.71 | 27.5 $\pm$ 0.71 | 33.5 $\pm$ 0.71 | 36 $\pm$ 0      |
| <i>A,a</i>      | 6                  | 5 $\pm$ 1.41   | 11.5 $\pm$ 0.71 | 20 $\pm$ 1.41   | 28.5 $\pm$ 0.71 | 31.5 $\pm$ 0.71 | 35.5 $\pm$ 0.71 | 37.5 $\pm$ 0.71 |
| <i>A,a</i>      | 7                  | 6 $\pm$ 2.83   | 12 $\pm$ 1.41   | 22.5 $\pm$ 0.71 | 28.5 $\pm$ 0.71 | 31.5 $\pm$ 0.71 | 36 $\pm$ 0      | 40 $\pm$ 0      |
| <i>A,a</i>      | 8                  | 4.5 $\pm$ 0.71 | 9.5 $\pm$ 0.71  | 17 $\pm$ 0      | 25 $\pm$ 1.41   | 28 $\pm$ 1.41   | 34 $\pm$ 1.41   | 36.5 $\pm$ 0.71 |
| <i>A,a</i>      | 9                  | 4.5 $\pm$ 0.71 | 11.5 $\pm$ 0.71 | 19 $\pm$ 1.41   | 26 $\pm$ 1.41   | 29 $\pm$ 0      | 33.5 $\pm$ 0.71 | 35.5 $\pm$ 0.71 |
| <i>A,a</i>      | 10                 | 4.5 $\pm$ 0.71 | 10.5 $\pm$ 0.71 | 15.5 $\pm$ 0.71 | 21 $\pm$ 1.41   | 25.5 $\pm$ 2.12 | 31 $\pm$ 2.83   | 34.5 $\pm$ 2.12 |
| <i>I,i</i>      | 1                  | 6.5 $\pm$ 0.71 | 12 $\pm$ 0      | 16 $\pm$ 1.41   | 24 $\pm$ 1.41   | 31 $\pm$ 1.41   | 35.5 $\pm$ 0.71 | 40 $\pm$ 0      |
| <i>I,i</i>      | 2                  | 6 $\pm$ 0      | 11.5 $\pm$ 0.71 | 16.5 $\pm$ 0.71 | 25.5 $\pm$ 2.12 | 31 $\pm$ 1.41   | 36.5 $\pm$ 0.71 | 40 $\pm$ 0      |
| <i>I,i</i>      | 3                  | 8 $\pm$ 0      | 14 $\pm$ 0      | 18.5 $\pm$ 0.71 | 26.5 $\pm$ 0.71 | 32 $\pm$ 1.41   | 36.5 $\pm$ 2.12 | 40 $\pm$ 0      |
| <i>I,i</i>      | 4                  | 6 $\pm$ 0      | 12 $\pm$ 0      | 17 $\pm$ 0      | 25.5 $\pm$ 0.71 | 31.5 $\pm$ 2.12 | 36.5 $\pm$ 2.12 | 40 $\pm$ 0      |
| <i>I,i</i>      | 5                  | 5 $\pm$ 0      | 10 $\pm$ 0      | 15 $\pm$ 0      | 21.5 $\pm$ 0.71 | 27.5 $\pm$ 0.71 | 32.5 $\pm$ 2.12 | 36 $\pm$ 0      |
| <i>I,i</i>      | 6                  | 7 $\pm$ 1.41   | 12 $\pm$ 0      | 17.5 $\pm$ 0.71 | 26 $\pm$ 1.41   | 30.5 $\pm$ 2.12 | 34 $\pm$ 1.41   | 40 $\pm$ 0      |
| <i>I,i</i>      | 7                  | 4.5 $\pm$ 0.71 | 9.5 $\pm$ 0.71  | 15.5 $\pm$ 0.71 | 23.5 $\pm$ 0.71 | 29 $\pm$ 0      | 34 $\pm$ 0      | 40 $\pm$ 0      |
| <i>I,i</i>      | 8                  | 5 $\pm$ 0      | 10 $\pm$ 0      | 15 $\pm$ 1.41   | 23.5 $\pm$ 0.71 | 28 $\pm$ 0      | 33.5 $\pm$ 0.71 | 38 $\pm$ 0      |
| <i>I,i</i>      | 9                  | 3.5 $\pm$ 0.71 | 9 $\pm$ 1.41    | 13.5 $\pm$ 0.71 | 21.5 $\pm$ 0.71 | 26.5 $\pm$ 0.71 | 32.5 $\pm$ 0.71 | 37.5 $\pm$ 0.71 |
| <i>I,i</i>      | 10                 | 0 $\pm$ 0      | 7.5 $\pm$ 0.71  | 13 $\pm$ 0      | 20 $\pm$ 0      | 25 $\pm$ 0      | 31 $\pm$ 1.41   | 36 $\pm$ 1.41   |
| <i>IA,a</i>     | 1                  | 7 $\pm$ 1.41   | 13 $\pm$ 1.41   | 17.5 $\pm$ 2.12 | 21 $\pm$ 1.41   | 24 $\pm$ 0      | 30 $\pm$ 1.41   | 32.5 $\pm$ 2.12 |
| <i>IA,a</i>     | 2                  | 8 $\pm$ 0      | 13 $\pm$ 0      | 17 $\pm$ 0      | 20 $\pm$ 0      | 23 $\pm$ 0      | 29 $\pm$ 0      | 33 $\pm$ 0      |
| <i>IA,a</i>     | 3                  | 8 $\pm$ 0      | 12 $\pm$ 0      | 17 $\pm$ 1.41   | 21 $\pm$ 1.41   | 28 $\pm$ 1.41   | 35 $\pm$ 0      | 37 $\pm$ 0      |
| <i>IA,a</i>     | 4                  | 0 $\pm$ 0      | 8.5 $\pm$ 0.71  | 14.5 $\pm$ 0.71 | 19.5 $\pm$ 0.71 | 23.5 $\pm$ 2.12 | 32 $\pm$ 1.41   | 34.5 $\pm$ 2.12 |
| <i>IA,a</i>     | 5                  | 7.5 $\pm$ 0.71 | 13.5 $\pm$ 0.71 | 16 $\pm$ 0      | 21.5 $\pm$ 0.71 | 26 $\pm$ 1.41   | 32.5 $\pm$ 0.71 | 34.5 $\pm$ 0.71 |
| <i>IA,a</i>     | 6                  | 6 $\pm$ 0      | 10 $\pm$ 1.41   | 14.5 $\pm$ 0.71 | 19 $\pm$ 1.41   | 22 $\pm$ 2.83   | 30.5 $\pm$ 0.71 | 33.5 $\pm$ 0.71 |
| <i>IA,a</i>     | 7                  | 8 $\pm$ 0      | 13.5 $\pm$ 0.71 | 19 $\pm$ 0      | 22.5 $\pm$ 0.71 | 24.5 $\pm$ 0.71 | 32.5 $\pm$ 0.71 | 35.5 $\pm$ 0.71 |
| <i>IA,a</i>     | 8                  | 3.5 $\pm$ 2.12 | 9 $\pm$ 1.41    | 14 $\pm$ 0      | 18.5 $\pm$ 0.71 | 21.5 $\pm$ 0.71 | 28.5 $\pm$ 2.12 | 32 $\pm$ 2.83   |
| <i>IA,a</i>     | 9                  | 7.5 $\pm$ 0.71 | 10.5 $\pm$ 0.71 | 16.5 $\pm$ 2.12 | 22 $\pm$ 1.41   | 24 $\pm$ 1.41   | 31 $\pm$ 1.41   | 35.5 $\pm$ 2.12 |
| <i>IA,a</i>     | 10                 | 7 $\pm$ 0      | 11.5 $\pm$ 0.71 | 17 $\pm$ 0      | 22 $\pm$ 0      | 25.5 $\pm$ 0.71 | 28 $\pm$ 0      | 30.5 $\pm$ 0.71 |
| <i>IA,i</i>     | 1                  | 6.5 $\pm$ 0.71 | 11 $\pm$ 1.41   | 17.5 $\pm$ 0.71 | 25.5 $\pm$ 2.12 | 31 $\pm$ 1.41   | 36 $\pm$ 1.41   | 40 $\pm$ 0      |
| <i>IA,i</i>     | 2                  | 6 $\pm$ 0      | 11.5 $\pm$ 0.71 | 17.5 $\pm$ 2.12 | 25.5 $\pm$ 0.71 | 29.5 $\pm$ 0.71 | 33.5 $\pm$ 0.71 | 40 $\pm$ 0      |
| <i>IA,i</i>     | 3                  | 7.5 $\pm$ 0.71 | 13 $\pm$ 0      | 20 $\pm$ 0      | 26.5 $\pm$ 2.12 | 31 $\pm$ 2.83   | 35 $\pm$ 4.24   | 40 $\pm$ 0      |
| <i>IA,i</i>     | 4                  | 9.5 $\pm$ 0.71 | 16.5 $\pm$ 2.12 | 21 $\pm$ 1.41   | 28 $\pm$ 0      | 31 $\pm$ 0      | 34.5 $\pm$ 2.12 | 40 $\pm$ 0      |
| <i>IA,i</i>     | 5                  | 7 $\pm$ 0      | 12 $\pm$ 0      | 17 $\pm$ 1.41   | 27.5 $\pm$ 0.71 | 32 $\pm$ 0      | 35.5 $\pm$ 0.71 | 40 $\pm$ 0      |
| <i>IA,i</i>     | 6                  | 7 $\pm$ 0      | 11.5 $\pm$ 0.71 | 16 $\pm$ 0      | 23.5 $\pm$ 0.71 | 28 $\pm$ 1.41   | 32 $\pm$ 1.41   | 40 $\pm$ 0      |
| <i>IA,i</i>     | 7                  | 5.5 $\pm$ 0.71 | 12 $\pm$ 1.41   | 19.5 $\pm$ 3.54 | 27 $\pm$ 4.24   | 30 $\pm$ 4.24   | 33.5 $\pm$ 3.54 | 35.5 $\pm$ 2.12 |
| <i>IA,i</i>     | 8                  | 9 $\pm$ 0      | 14.5 $\pm$ 0.71 | 21.5 $\pm$ 0.71 | 30.5 $\pm$ 0.71 | 34 $\pm$ 0      | 37.5 $\pm$ 0.71 | 40 $\pm$ 0      |
| <i>IA,i</i>     | 9                  | 8.5 $\pm$ 0.71 | 13.5 $\pm$ 0.71 | 20 $\pm$ 0      | 26.5 $\pm$ 2.12 | 30.5 $\pm$ 2.12 | 34.5 $\pm$ 2.12 | 40 $\pm$ 0      |
| <i>IA,i</i>     | 10                 | 5 $\pm$ 0      | 10.5 $\pm$ 0.71 | 19.5 $\pm$ 0.71 | 26 $\pm$ 0      | 29.5 $\pm$ 0.71 | 33.5 $\pm$ 0.71 | 40 $\pm$ 0      |

**Table S2.** Expression levels of genes of *IA,a* compared to the parent *A,a* (control). The hypothesis test performed by REST2009 and based on 1000 iterations provides a *p-value* which represents the probability of the alternate hypothesis that the difference between *IA,a* and *A,a* is due only to chance.

| Gene ID | Fold change (expression level) | <i>p-value</i> |
|---------|--------------------------------|----------------|
| 46054   | 3.64                           | 0.05           |
| 59167   | 0.27                           | 0.00           |
| 147699  | 1.17                           | 0.52           |
| 143314  | 2.75                           | 0.00           |
| 33584   | 89.06                          | 0.00           |
| 109183  | 0.29                           | 0.00           |
| 148283  | 32.87                          | 0.00           |
| 108968  | 0.22                           | 0.00           |
| 46250   | 0.62                           | 0.30           |

**Table S3.** Expression levels of genes of *IA,i* compared to the parent *I,i* (control). The hypothesis test performed by REST2009 and based on 1000 iterations provides a *p-value* which represents the probability of the alternate hypothesis that the difference between *IA,i* and *I,i* is due only to chance.

| Gene ID | Fold change (expression level) | <i>p-value</i> |
|---------|--------------------------------|----------------|
| 46054   | 1.44                           | 0.22           |
| 59167   | 1.70                           | 0.17           |
| 147699  | 0.28                           | 0.00           |
| 143314  | 0.96                           | 0.93           |
| 33584   | 0.27                           | 0.06           |
| 109183  | 0.59                           | 0.23           |
| 148283  | 0.02                           | 0.00           |
| 108968  | 0.57                           | 0.08           |
| 46250   | 0.82                           | 0.58           |

**Table S4.** Expression levels of genes of hybrid *IA,i* compared to the hybrid *IA,a*. The hypothesis test performed by REST2009 and based on 1000 iterations provides a *p-value* which represents the probability of the alternate hypothesis that the difference between *IA,i* and *IA,a* is due only to chance.

| Gene ID | Fold change (expression level) | <i>p-value</i> |
|---------|--------------------------------|----------------|
| 46054   | 2.335                          | 0.01           |
| 59167   | 1.330                          | 0.49           |
| 147699  | 0.959                          | 0.92           |
| 143314  | 1.404                          | 0.41           |
| 33584   | 2.170                          | 0.01           |
| 109183  | 0.815                          | 0.63           |
| 148283  | 4.993                          | 0.01           |
| 108968  | 0.720                          | 0.41           |

**Table S5.** List of isolates used in the work and their Mycotheca Universitatis Taurinensis (MUT) accession numbers.

| Genotype    | Species                                                                       | MUT accession N. |
|-------------|-------------------------------------------------------------------------------|------------------|
| <i>I,i</i>  | <i>H. irregulare</i>                                                          | MUT00005666      |
| <i>A,a</i>  | <i>H. annosum</i> s.s.                                                        | MUT00003656      |
| <i>IA,i</i> | Artificial heterokaryotic hybrid<br>(with <i>H. irregulare</i> mitochondria)  | MUT00005668      |
| <i>IA,a</i> | Artificial heterokaryotic hybrid<br>(with <i>H. annosum</i> s.s mitochondria) | MUT00005669      |

**Table S6.** List of the *Heterobasidion* spp. primers used in the current work and relative Temperature of annealing (Ta).

| Sequence              | Name                  | Ta (°C) |
|-----------------------|-----------------------|---------|
| GGCAGTTTGGTGCACCTAC   | <i>Het_Trypt_metF</i> | 60      |
| CCACCAGCCTGCGTACTT    | <i>Het_Trypt_metR</i> |         |
| AGTGCTGCAACTCTGTCCAG  | <i>Het46054f</i>      | 60      |
| CAATTGATGCCAACCATGGTG | <i>Het46054r</i>      |         |
| AAACGGGACGCTGGTTGAT   | <i>Het108968Af</i>    | 60      |
| GTGGGCAAAGGCGAAGTAT   | <i>Het108968Ar</i>    |         |
| CGGAGCCTATCACGACTGA   | <i>Het436250Af</i>    | 60      |
| AGTGCCGGAGACCTGAGAT   | <i>Het436250Ar</i>    |         |
| GATGTCGTGAAGCGGGAAGG  | <i>Het109183Af</i>    | 60      |
| TATTCGCCAGATCGCTCGC   | <i>Het109183Ar</i>    |         |
| GACGGCGGCATTGTGTTCTA  | <i>Het148283Af</i>    | 60      |
| GACTTCAACCAGCTCCTGCC  | <i>Het148283Ar</i>    |         |
| GCGCCAAGACTCATCCTAGC  | <i>Het143314Af</i>    | 60      |
| TCATAGTGCGACTCCTCGCT  | <i>Het143314Ar</i>    |         |
| AACTCCGTGATTTTCGGCCC  | <i>Het147699Af</i>    | 62      |
| ATCAGGGTGCCGATCCAGAA  | <i>Het147699Ar</i>    |         |
| ATTCTACTCACCCGACCGA   | <i>Het33584Af</i>     | 60      |
| CGAAGGCCGAGCACAACATA  | <i>Het33584Ar</i>     |         |
| ATGTCGTAGAGGAGGGCGTC  | <i>Het59167Af</i>     | 62      |
| TTCACCTGCCGTGTACGGTG  | <i>Het59167Ar</i>     |         |

**Table S7.** Average Ct values of the nine selected genes in the four different genotypes (Ct values of each of the three biological replicates  $\pm$  SD of technical replicates).

|                  | <i>Biological replicate</i> | <i>Aa1</i> | <i>Aa2</i> | <i>Aa3</i> | <i>Ii1</i> | <i>Ii2</i> | <i>Ii3</i> | <i>IA,i1</i> | <i>IA,i2</i> | <i>IA,i3</i> | <i>IA,a1</i> | <i>IA,a2</i> | <i>IA,a3</i> |
|------------------|-----------------------------|------------|------------|------------|------------|------------|------------|--------------|--------------|--------------|--------------|--------------|--------------|
| <b>Gene ID</b>   |                             |            |            |            |            |            |            |              |              |              |              |              |              |
| <i>Trypt_met</i> |                             | 19.51      | 18.56      | 23.35      | 22.77      | 22.70      | 18.11      | 24.89        | 24.17        | 23.21        | 21.26        | 20.62        | 22.50        |
| <i>SD</i>        |                             | 0.32       | 0.27       | 0.66       | 0.24       | 0.28       | 0.32       | 0.84         | 0.46         | 0.21         | 0.26         | 0.43         | 0.47         |
| <i>46054</i>     |                             | 15.27      | 14.58      | 23.90      | 20.42      | 19.41      | 15.74      | 21.63        | 21.51        | 19.54        | 17.38        | 16.27        | 17.47        |
| <i>SD</i>        |                             | 0.25       | 0.37       | 0.63       | 0.24       | 0.12       | 0.19       | 0.21         | 0.21         | 0.12         | 0.16         | 0.37         | 0.15         |
| <i>59167mit</i>  |                             | 16.63      | 16.24      | 21.21      | 21.95      | 21.85      | 18.69      | 25.13        | 24.34        | 22.43        | 20.50        | 19.65        | 22.63        |
| <i>SD</i>        |                             | 0.01       | 0.09       | 0.10       | 0.81       | 0.25       | 0.08       | 0.96         | 0.44         | 0.79         | 0.05         | 0.33         | 0.67         |
| <i>147699</i>    |                             | 16.45      | 14.75      | 20.09      | 17.32      | 16.44      | 13.39      | 20.26        | 20.75        | 20.27        | 17.32        | 16.90        | 19.35        |
| <i>SD</i>        |                             | 0.86       | 0.25       | 0.38       | 0.32       | 0.28       | 0.30       | 0.15         | 0.07         | 0.12         | 0.28         | 0.18         | 0.11         |
| <i>143314</i>    |                             | 18.23      | 18.77      | 19.66      | 17.89      | 17.62      | 19.22      | 20.10        | 21.75        | 21.77        | 19.13        | 19.95        | 19.18        |
| <i>SD</i>        |                             | 0.07       | 0.07       | 0.08       | 0.88       | 0.16       | 0.15       | 0.04         | 0.10         | 0.07         | 0.08         | 0.06         | 0.11         |
| <i>33584mit</i>  |                             | 20.32      | 18.65      | 23.48      | 22.71      | 22.68      | 20.41      | 25.64        | 25.28        | 24.31        | 19.83        | 19.72        | 20.46        |
| <i>SD</i>        |                             | 0.69       | 0.50       | 0.82       | 0.27       | 0.44       | 0.07       | 0.27         | 0.10         | 0.17         | 0.13         | 0.22         | 0.03         |
| <i>109183</i>    |                             | 17.38      | 16.73      | 22.55      | 21.61      | 20.45      | 18.95      | 23.71        | 24.83        | 23.44        | 21.25        | 20.51        | 23.22        |
| <i>SD</i>        |                             | 0.16       | 0.20       | 0.03       | 0.35       | 0.40       | 0.01       | 0.29         | 0.24         | 0.45         | 0.26         | 0.17         | 0.24         |
| <i>148283</i>    |                             | 25.45      | 23.93      | 26.84      | 20.35      | 17.65      | 15.38      | 25.60        | 24.29        | 25.03        | 23.53        | 22.35        | 23.19        |
| <i>SD</i>        |                             | 0.67       | 0.32       | 0.20       | 0.05       | 0.12       | 0.24       | 0.18         | 2.03         | 0.70         | 0.29         | 0.31         | 0.23         |
| <i>108968</i>    |                             | 19.29      | 18.40      | 21.56      | 22.52      | 22.23      | 19.49      | 25.39        | 25.58        | 24.37        | 21.11        | 23.37        | 24.39        |
| <i>SD</i>        |                             | 0.22       | 0.08       | 0.36       | 0.37       | 0.27       | 0.38       | 0.92         | 0.68         | 0.29         | 0.13         | 0.34         | 0.23         |
| <i>46250</i>     |                             | 21.14      | 20.43      | 25.53      | 24.54      | 23.61      | 19.66      | 26.34        | 25.20        | 26.22        | 21.71        | 24.21        | 26.22        |
| <i>SD</i>        |                             | 1.50       | 1.74       | 1.00       | 0.06       | 0.82       | 0.47       | 0.58         | 0.10         | 0.40         | 0.15         | 0.93         | 0.40         |
